# Supplementary material for: Characterization of Biological Properties of Individual Phenolamides and Phenolamide-Enriched Leaf Tomato Extracts
Source: MDPI journal article supplement (doi:10.3390/molecules28041552), 2023-02-06
Supplement: s1 [file s1]

# **Supplementary materials**

## **Characterization of biological properties of individual phenolamides and phenolamide-enriched leaf tomato extracts**

**Marwa Roumani <sup>1,†</sup>, Armelle Ropars <sup>2,†</sup>, Christophe Robin <sup>1</sup>, Raphaël E. Duval <sup>3</sup>, Jean-Pol Frippiat <sup>2</sup>, Michel Boisbrun <sup>3,\*</sup> and Romain Larbat <sup>1,4,\*</sup>**

<sup>1</sup> Université de Lorraine, INRAE, LAE, F-54000 Nancy, France

<sup>2</sup> Université de Lorraine, SIMPA, F-54000 Nancy, France

<sup>3</sup> Université de Lorraine, CNRS, L2CM, F-54000 Nancy, France

<sup>4</sup> Institut Agro, University of Angers, INRAE, IRHS, SFR QUASAV, F-49000 Angers, France

\* Correspondence: michel.boisbrun@univ-lorraine.fr (M.B.); romain.larbat@inrae.fr (R.L.)

† These authors contributed equally to this work.

## Table of contents

**Figure S1.** Minimum inhibitory concentrations (MICs) in mg/L of Kukoamine A (Kuk\_A), caffeoylputrescine (CP), and  $N^1,N^5,N^{14}$ -tris(dihydrocaffeoyl)spermine (TDHCS) against listed bacterial strains.

**Figure S2.** TDHCS cytotoxic activity on MCF-7 cells. Mean of eight points were calculated and standard deviation are represented.

**Figure S3.** TDHCS cytotoxic activity on Caco-2 cells. Mean of eight points were calculated and standard deviation are represented.

**Figure S4.** Calibration curves for metabolites quantification at specified wavelength

| Bacterial strains              | Kuk_A (mg/L) | CP (mg/L)  | TDHCS (mg/L) |
|--------------------------------|--------------|------------|--------------|
| <i>Staphylococcus aureus</i>   | <b>256</b>   | <b>512</b> | >1024        |
| <i>Enterococcus faecalis</i>   | 1024         | 1024       | >1024        |
| <i>Pseudomonas aeruginosa</i>  | 1024         | >1024      | >1024        |
| <i>Escherichia coli</i>        | 1024         | >1024      | >1024        |
| <i>Klebsiella pneumoniae</i>   | >1024        | >1024      | >1024        |
| <i>Acinetobacter baumannii</i> | 512          | >1024      | <b>256</b>   |
| <i>Enterobacter cloacae</i>    | 1024         | >1024      | >1024        |

**Figure S1.** Minimum inhibitory concentrations (MICs) in mg/L of Kukoamine A (Kuk\_A), caffeoylputrescine (CP), and  $N^1,N^5,N^{14}$ -tris(dihydrocaffeoyl)spermine (TDHCS) against listed bacterial strains.

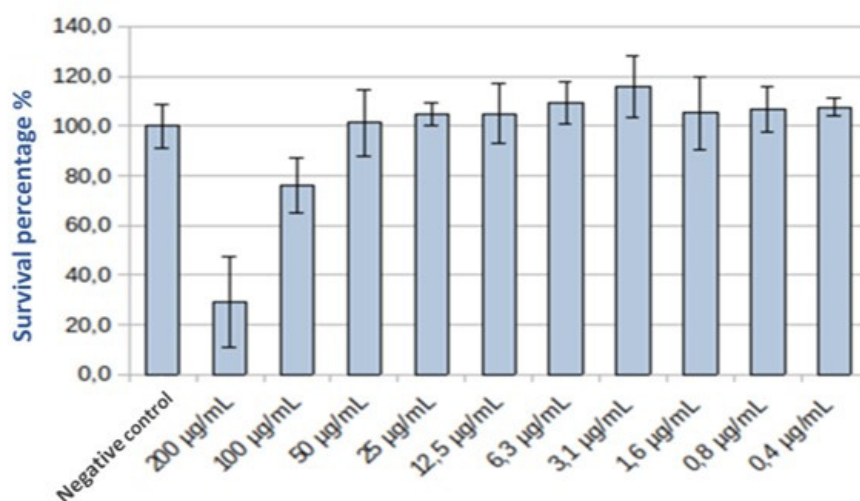

**Figure S2.** TDHCS cytotoxic activity on MCF-7 cells. Mean of eight points were calculated and standard deviation are represented.

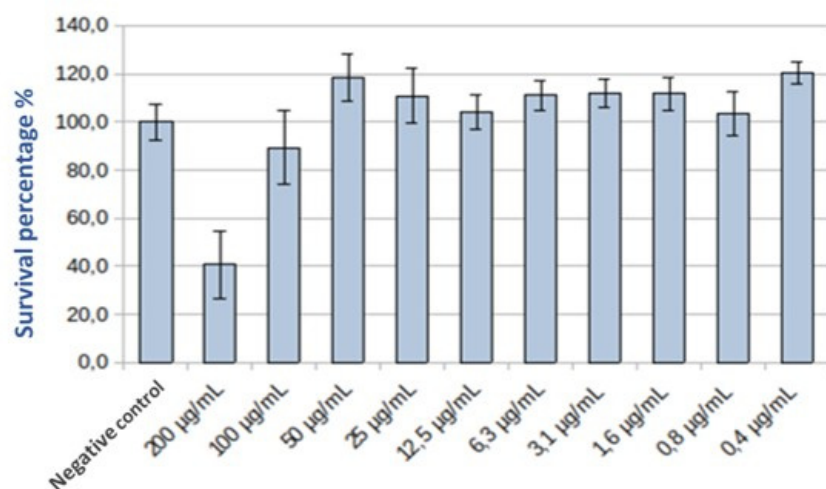

**Figure S3.** TDHCS cytotoxic activity on Caco-2 cells. Mean of eight points were calculated and standard deviation are represented.

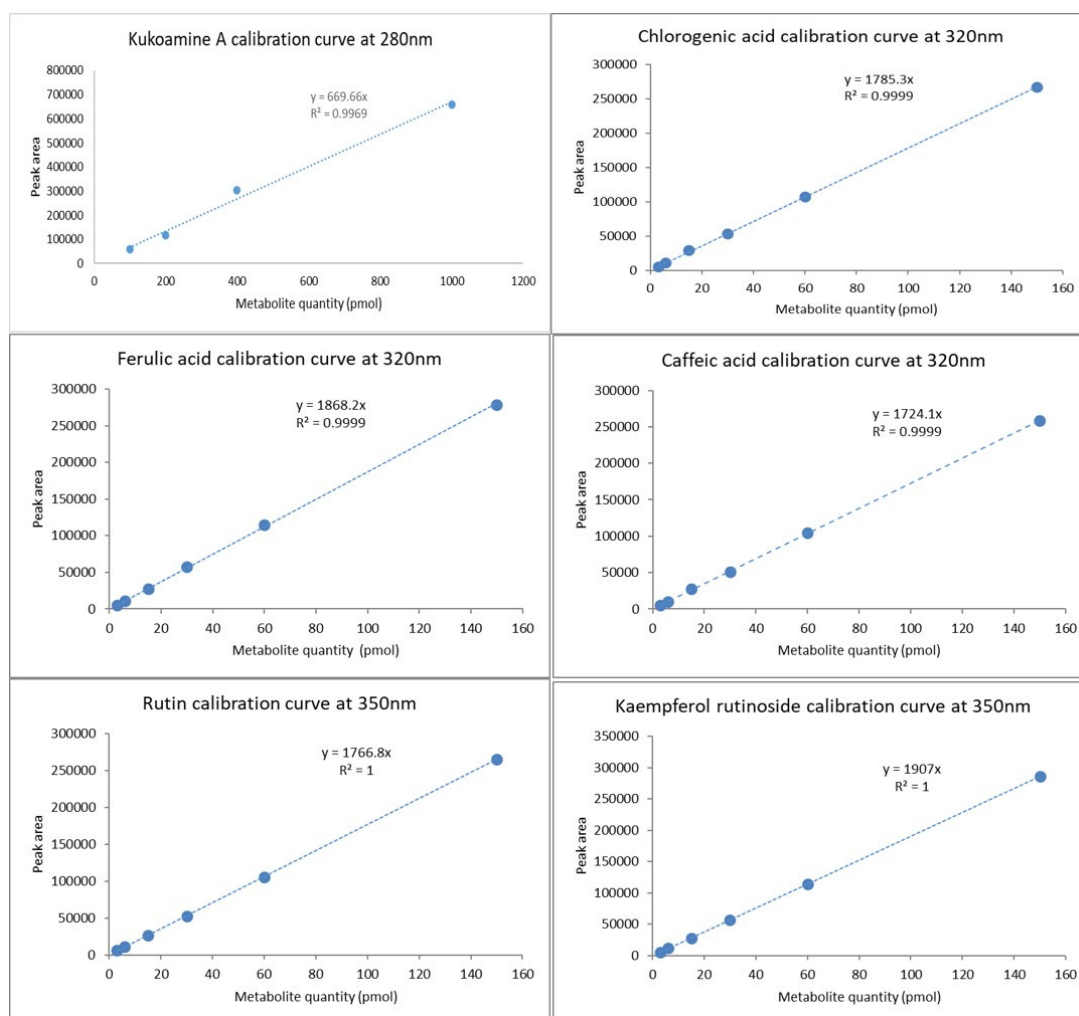

**Figure S4.** Calibration curves for metabolites quantification at specified wavelength
